# Supplementary material for: Collateral activity of the CRISPR/RfxCas13d system in human cells
Source: PubMed Central journal article supplement (PMC10049998; doi:10.1038/s42003-023-04708-2), 2023-03-28
Supplement: 42003_2023_4708_MOESM2_ESM.pdf [file 42003_2023_4708_MOESM2_ESM.pdf]

Supplementary Information for

**Collateral activity of the CRISPR/RfxCas13d system in human cells**

Peiguo Shi<sup>1,\*</sup>, Michael R. Murphy<sup>1</sup>, Alexis O. Aparicio<sup>1</sup>, Jordan S. Kesner<sup>1</sup>, Zhou Fang<sup>1</sup>,  
Ziheng Chen<sup>1,2</sup>, Aditi Trehan<sup>1</sup>, Yang Guo<sup>1</sup>, Xuebing Wu<sup>1,\*</sup>

<sup>1</sup>Department of Medicine and Department of Systems Biology, Columbia University Irving  
Medical Center, New York, NY 10032, USA

<sup>2</sup>Current address: Department of Biological Sciences, Carnegie Mellon University,  
Pittsburgh, PA 15213, USA

\*Correspondence to: [ps3008@cumc.columbia.edu](mailto:ps3008@cumc.columbia.edu) (P.S.), [xw2629@cumc.columbia.edu](mailto:xw2629@cumc.columbia.edu)  
(X.W.)

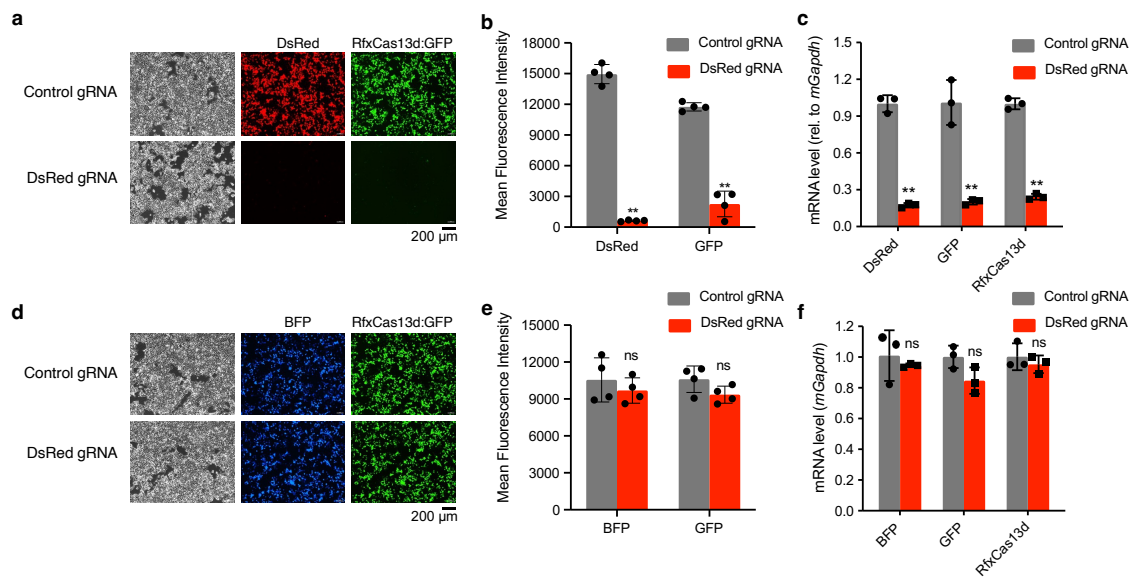

**Supplementary Figure 1.** The loss of BFP/GFP depends on the target of the gRNA (i.e., DsRed). **(a-c)**, Cells were transfected with RfxCas13d-2A-GFP, DsRed, and either a DsRed targeting gRNA or a non-targeting control gRNA. The fluorescent images **(a)** were quantified in **(b)** and the mRNA changes were quantified in **(c)**. **(d-f)**, same as **(a-c)** but replacing DsRed with BFP. Note that BFP/GFP are only down-regulated when DsRed is present and targeted by RfxCas13d loaded with a DsRed gRNA. Two-tailed Student's *t*-test was used. \*\*:  $p < 0.01$ .  $N = 3-4$  for all panels. Scale bar, 200  $\mu\text{m}$ . Error bars represent standard deviation.

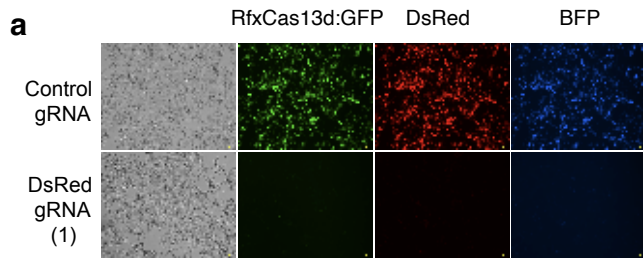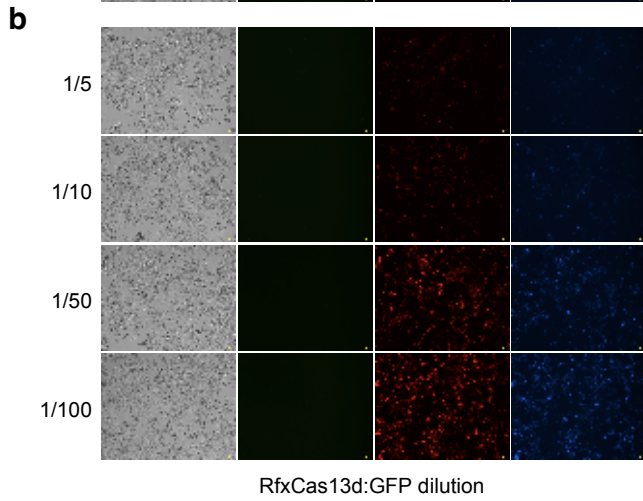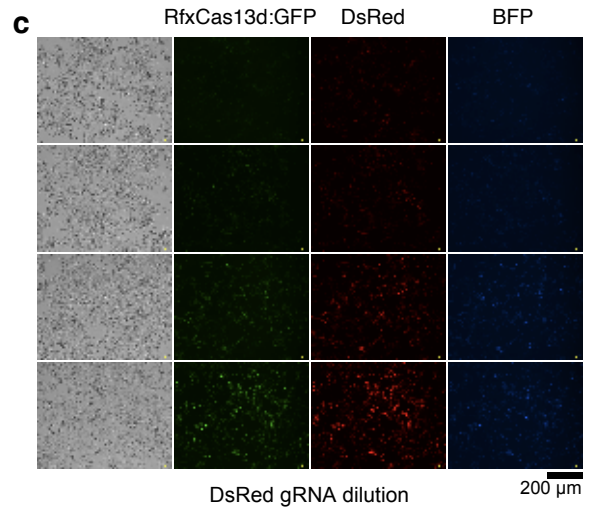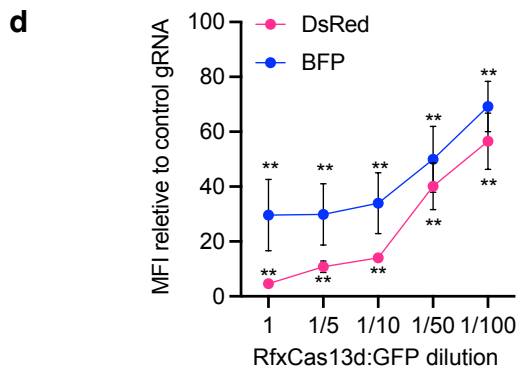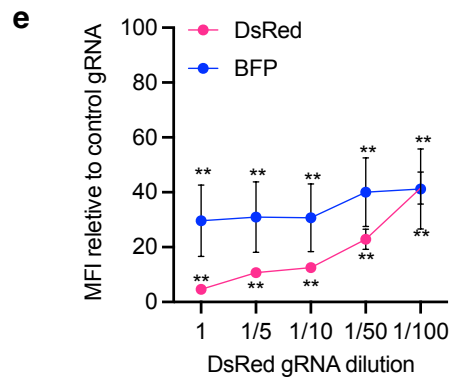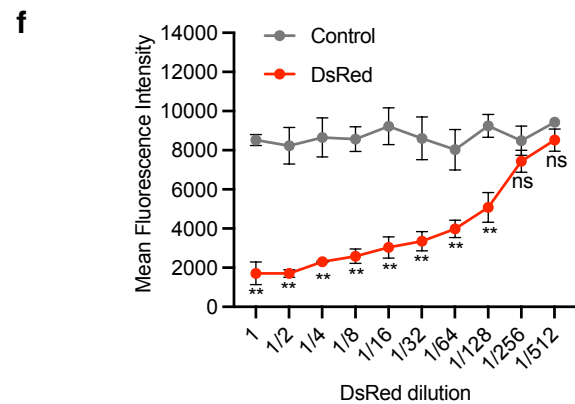

**Supplementary Figure 2.** The effect of titrating Cas13d and gRNA expression on collateral activity and on-target knockdown efficiency. **(a)** Fluorescent imaging of cells transfected with Cas13:GFP, DsRed (target), BFP, and either a control gRNA (top row) or a DsRed gRNA (bottom row). **(b)** same as **(a)** (bottom) except Cas13:GFP expression is reduced by transfecting 5, 10, 50, or 100-fold less plasmids. **(c)** Similar to **(b)** but DsRed gRNA expression is reduced. **(d-e)**, quantification of **(b-c)**, respectively; DsRed and BFP compared with the control group DsRed and BFP, respectively. **(f)** Quantification of BFP signal in **Fig. 1i.**, which was then used to generate **Fig. 1j.** Two-way ANOVA was used. \*\*:  $p < 0.01$ . N=3 for all panels. Scale bar, 200  $\mu\text{m}$ . Error bars represent standard deviation.

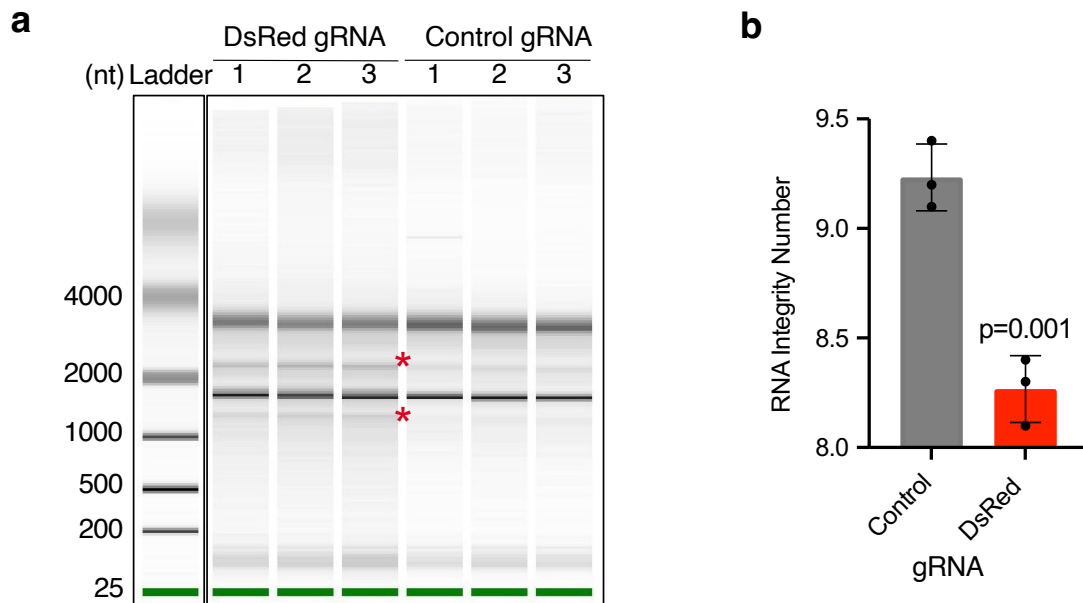

**Supplementary Figure 3.** Targeting DsRed with CRISPR/RfxCas13d led to rRNA degradation (**a**, BioAnalyzer) and a significant reduction of RNA integrity number (RIN) (**b**). The asterisks indicate potential degradation products of the rRNA. Note that the absolute decrease of the RIN number (~10%) is smaller than the decrease in total RNA content (**Fig. 1f**, ~46%), presumably because RIN measures RNA fragmentation and does not capture fragmented RNAs that have been degraded completely by cells prior to RNA extraction. P value was calculated using two-tailed Student's *t*-test. N=3. Error bars represent standard deviation.

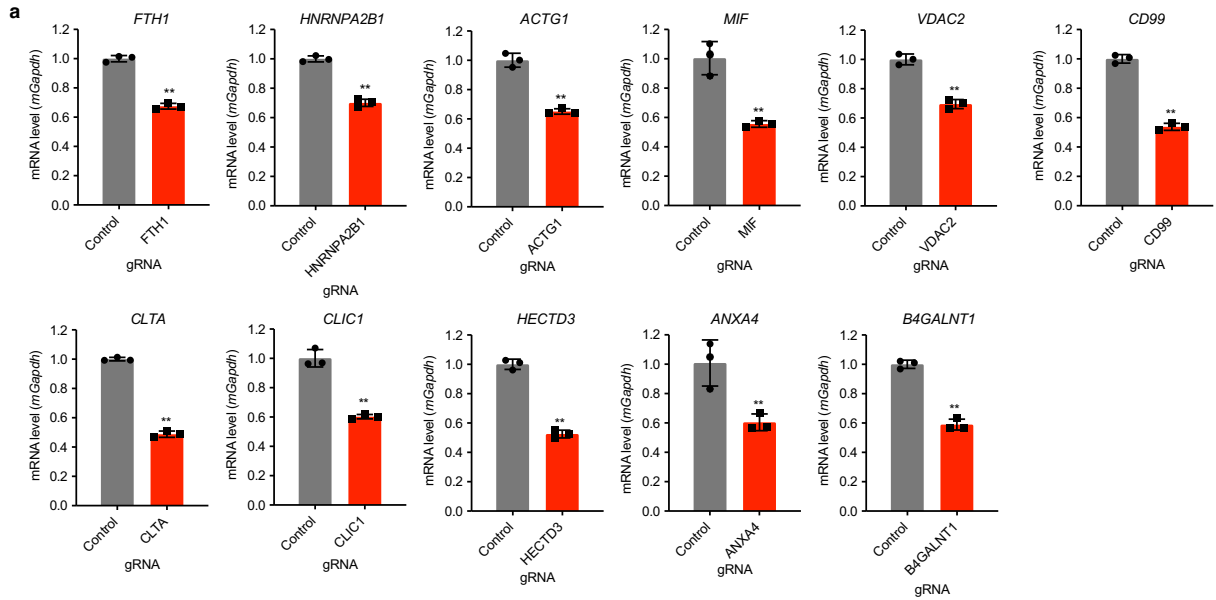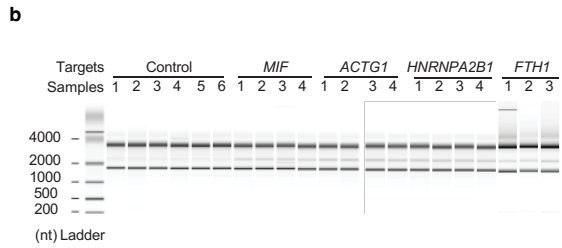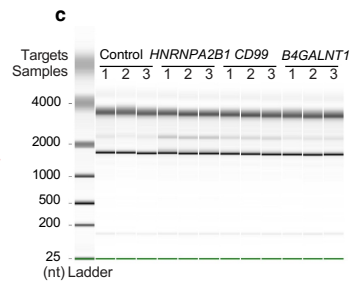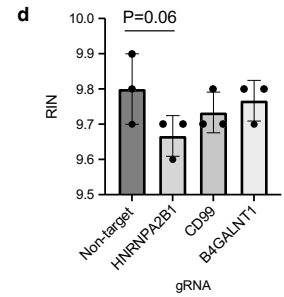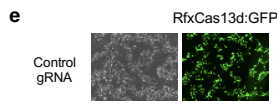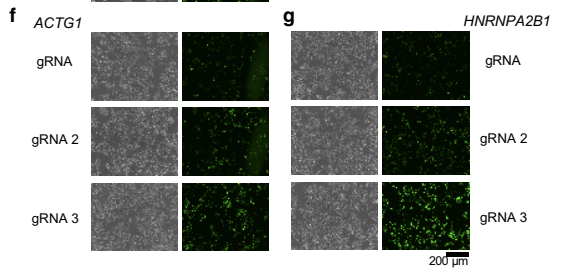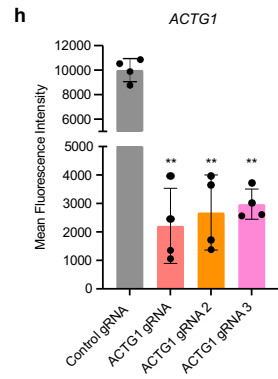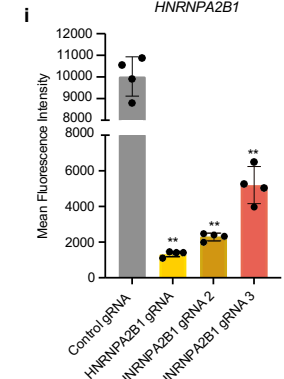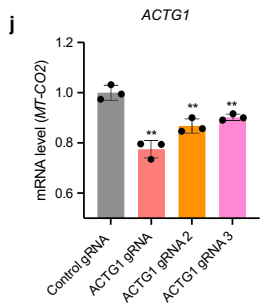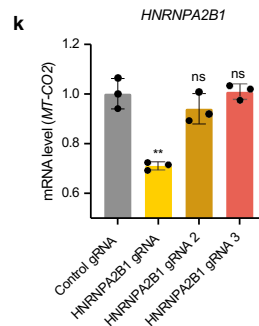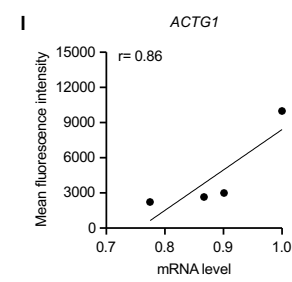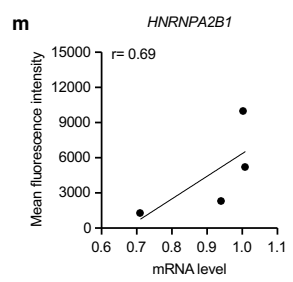

**Supplementary Figure 4:** RfxCas13d-mediated knockdown of endogenous targets. **(a)** qPCR quantification of knockdown efficiency for each target. **(b)** Targeting four abundant endogenous transcripts resulted in rRNA degradation (BioAnalyzer assay similar to **Supplementary Fig. 3**). Three to six biological replicates were shown for each target. **(c)** Similar to **(b)** but comparing high, medium, and low abundance targets. **(d)**, RNA integrity number (RIN) quantified from **(c)**. **(e-m)** Cells transfected with RfxCas13d:GFP, and a control gRNA **(e)**, ACTG1 gRNAs **(f)**, or HNRNPA2B1 gRNAs **(g)**. The fluorescent images **(e-g)** were quantified in **(h-i)** and the mRNA changes were quantified in **(j-k)**, respectively. The correlation between target mRNA knockdown and collateral activity (GFP) for *ACTG1* and *HNRNPA2B1* targeting were shown in **(l-m)**, respectively. r: Pearson's correlation coefficient. Two-tailed Student's *t*-test for **(a)**. Two-way ANOVA test for **(d, h-k)**. \*\*:  $p < 0.01$ . N=3 or 4 for all panels. Error bars represent standard deviation.

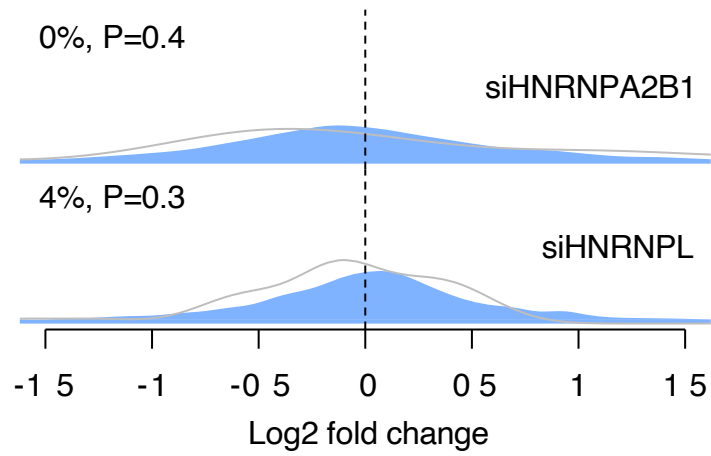

**Supplementary Figure 5.** siRNA-mediated knockdown of *HNRNPA2B1* or *HNRNPL* did not result in down-regulation of the transcriptome (relative to mitochondrial RNA). P value was calculated using Wilcoxon Rank Sum Test.



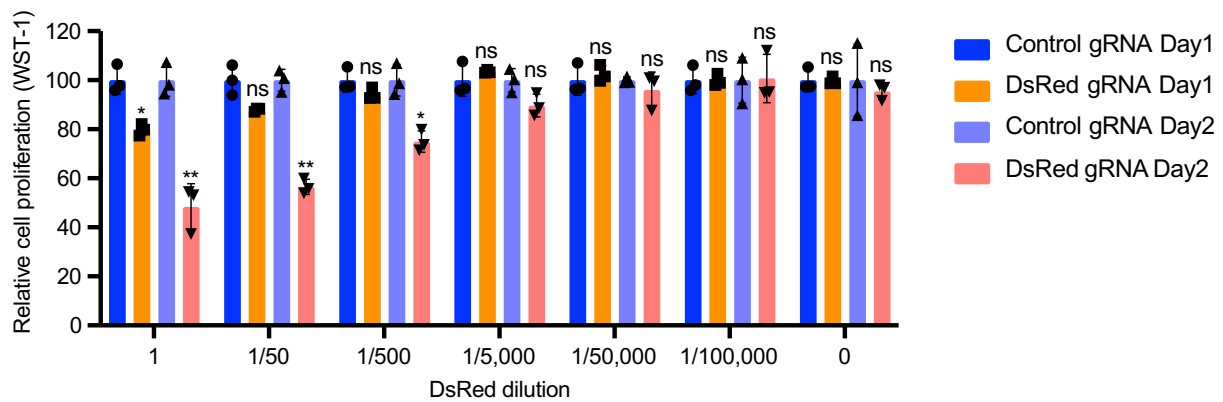

**Supplementary Figure 6.** Change in cell proliferation (WST-1 assay) in cells transfected with varying amount of DsRed plasmids, together with a fixed amount of RfxCas13d and gRNA plasmids. Two-way ANOVA was performed to obtain the P value. \*:  $p < 0.05$ ; \*\*:  $p < 0.01$ . N=3. Error bars represent standard deviation.

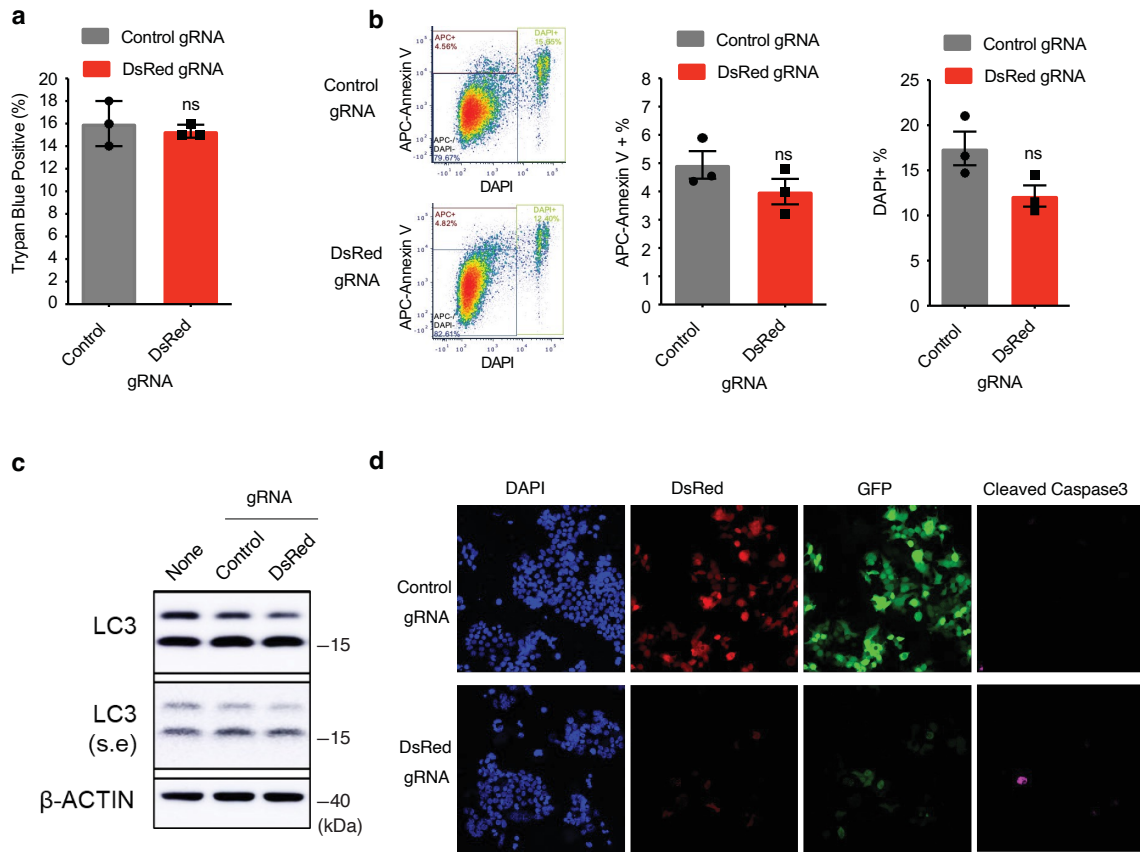

**Supplementary Figure 7.** DsRed-induced RfxCas13d collateral activity does not cause cell death. HEK293T cells were transfected with DsRed, RfxCas13d-2A-GFP, and either a DsRed-targeting gRNA or a non-targeting control gRNA. No difference was detected with trypan blue-based cell death assay (a), Annexin V - APC / DAPI cell apoptosis assay (b), LC3 cleavage (autophagy) (c), or Caspase3 cleavage (apoptosis) (d). Two-tailed Student's *t*-test was used to calculate P values. N=3 for all panels. Scale bar, 50  $\mu$ m. Error bars represent standard deviation.

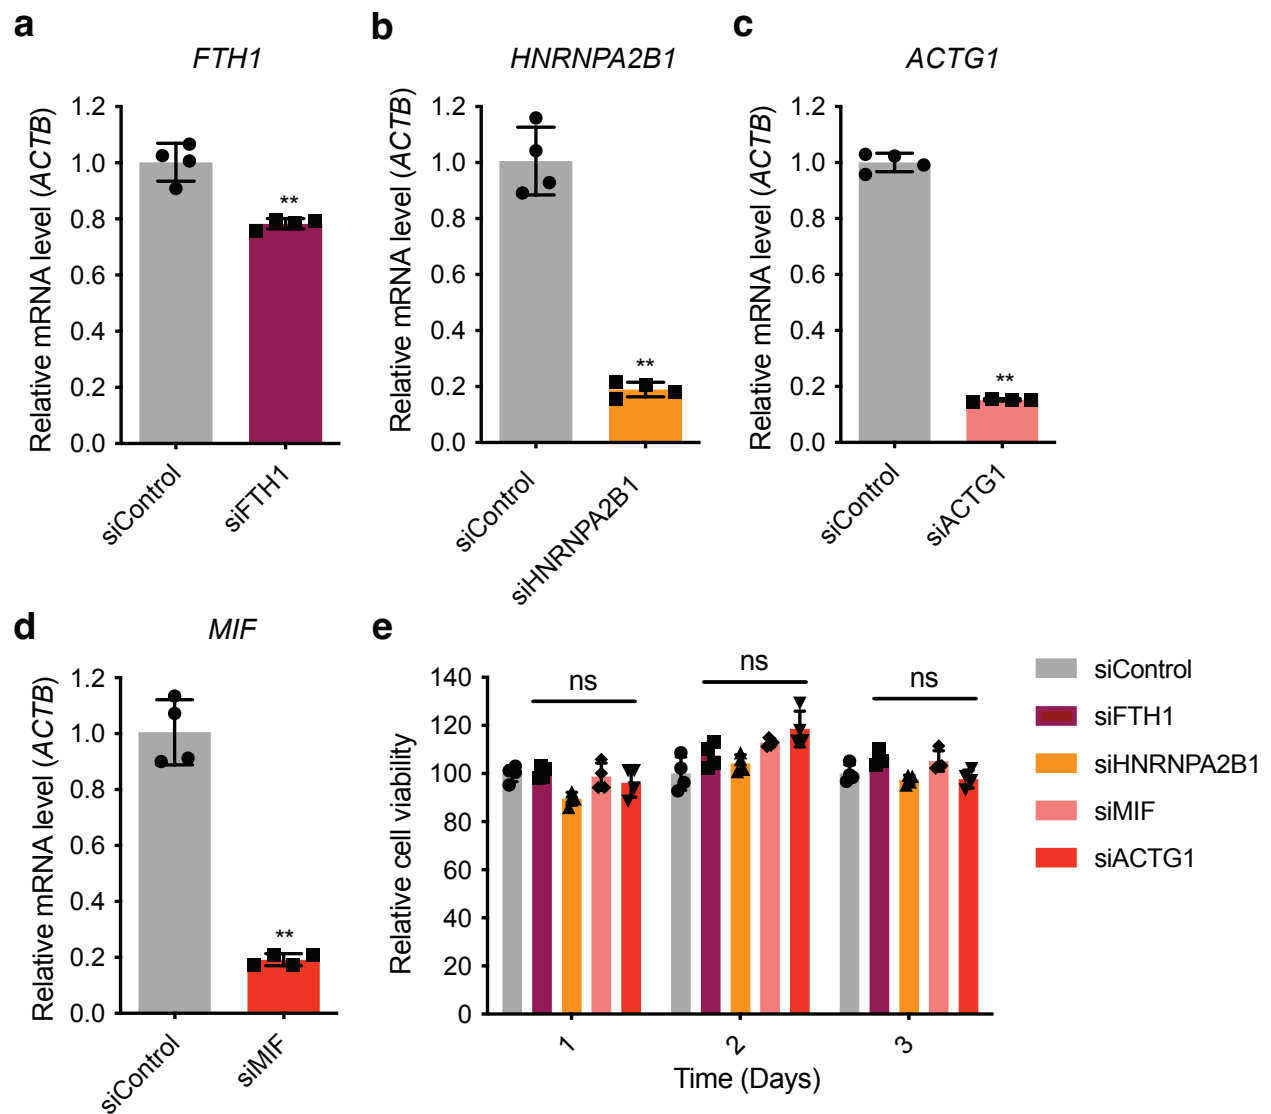

**Supplementary Figure 8.** siRNA-mediated knockdown of abundant endogenous mRNAs did not affect cell proliferation. (a-d), knockdown efficiency for *FTH1*, *HNRNPA2B1*, *ACTG1*, and *MIF*, respectively. (e), Relative cell proliferation (WST-1) comparing knockdown and controls. For (a-d), two-tailed Student's *t*-test was performed to calculate P values. For (e), two-way ANOVA was performed to calculate the P value. \*\*:  $p < 0.01$ . N=3-4 for all panels. Error bars represent standard deviation.

**a**

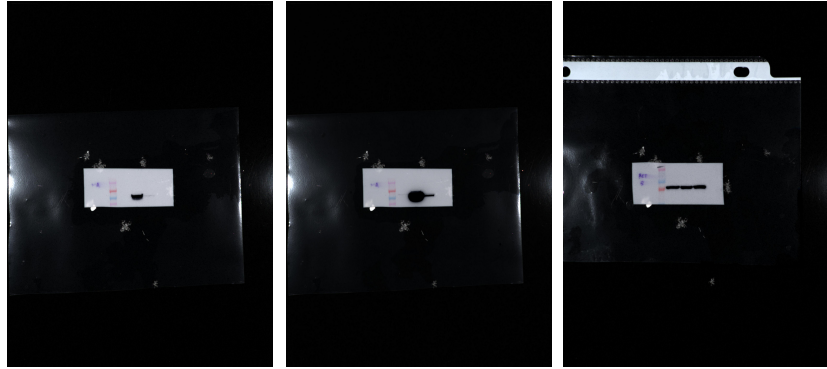

**b**

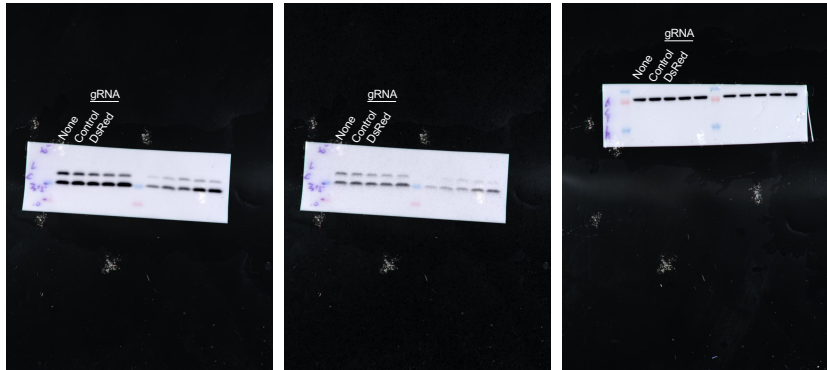

**Supplementary Figure 9.** (a) Raw gel image for (Fig. 1d). (b) Raw gel image for (Supplementary Figure 7c).

**Supplementary Table 1: Guide RNA (gRNA) spacer sequences.**

| <b>gRNA</b>                    | <b>Sequence</b>          |
|--------------------------------|--------------------------|
| DsRed                          | GGAGGTCAAACAGCGTGGATG    |
| DsRed gRNA 2                   | TGGCGTCTCCAGGCGATCTGAC   |
| DsRed gRNA 3                   | ACAGCGTGGATGGCGTCTCCAG   |
| DsRed gRNA 4                   | TGTCTTCTATGGAGGTCAAAC    |
| DsRed gRNA 5                   | AGGCCGCCGGTGTCTTCTATGG   |
| DsRed gRNA 6                   | CGGTAGCGCTAGGCCGCCGGTG   |
| DsRed gRNA 7                   | GATCTGAGTCCGGTAGCGCTAG   |
| DsRed gRNA 8                   | GCGACCGGTGGATCTGAGTCCG   |
| DsRed gRNA 9                   | GGCCATGGTGGCGACCGGTGGA   |
| DsRed gRNA 10                  | CCTCGGAGGAGGCCATGGTGGC   |
| Control (for DsRed)            | GTTTTGACCTCCATAGAAGACA   |
| MIF                            | GTTTACGATGAACATCGGCATGA  |
| ACTG1                          | AGAATGAATACATTTACAGGCGT  |
| ACTG1 gRNA 2                   | CTCAAAGCAAGTAACAGCCCACG  |
| ACTG1 gRNA 3                   | AGCCATTGTCAATGACCAGCGCG  |
| HNRNPA2B1                      | GTTTCAAAGCTTAAGCCACCAAT  |
| HNRNPA2B1 gRNA 2               | TCCTATTTATACAGTGAAGCCCA  |
| HNRNPA2B1 gRNA 3               | CCATAGTTGTCATAACCCACCTCC |
| FTH1                           | TGTCAAAGAGATATTCCGCCAAG  |
| CLIC1                          | ATTTGGCAAATATGTCCAGCCCA  |
| VDAC2                          | GACGTTGAAAATTCCACGCCACT  |
| CD99                           | GTTAGTAAACATCATCCGCCAG   |
| CLTA                           | CAGAATAATGCACAGAAGCACAG  |
| ANXA4                          | CTTTACTATAGCCAGCAGAGCAT  |
| B4GALNT1                       | ATGACAAGAAGAAGCCAGTCTGC  |
| HECTD3                         | TCCAGAAATACTGCACCCGCGA   |
| Control (for endogenous genes) | TCACCAGAAGCGTACCATACTCA  |

**Supplementary Table 2: RT-qPCR primers sequences.**

| <b>Primer</b>            | <b>Sequence</b>           |
|--------------------------|---------------------------|
| <i>mGapdh</i> -qPCR-F    | TGAAGCAGGCATCTGAGGG       |
| <i>mGapdh</i> -qPCR-R    | CGAAGGTGGAAGAGTGGGAG      |
| <i>MT-CO2</i> -qPCR-F    | CCGTCTGAACTATCCTGCCC      |
| <i>MT-CO2</i> -qPCR-R    | GAGGGATCGTTGACCTCGTC      |
| <i>Cas13d</i> -qPCR-F    | GGTCTACACCATGATGGACTTT    |
| <i>Cas13d</i> -qPCR-R    | CGCTCAGGGACTTCTCATTATC    |
| <i>BFP</i> -qPCR-F       | GAGAGTCACCACATACGAAGAC    |
| <i>BFP</i> -qPCR-R       | CCCTCTGATCTTGACGTTGTAG    |
| <i>GFP</i> -qPCR-F       | GAACCGCATCGAGCTGAA        |
| <i>GFP</i> -qPCR-R       | TGCTTGTCGGCCATGATATAG     |
| <i>DsRed</i> -qPCR-F     | CCCCGTAATGCAGAAGAAGA      |
| <i>DsRed</i> -qPCR-R     | GGTGATGTCCAGCTTGGAGT      |
| <i>FTH1</i> -qPCR-F      | CCCCATTTGTGTGACTTCAT      |
| <i>FTH1</i> -qPCR-R      | GCCCGAGGCTTAGCTTTCATT     |
| <i>HNRNPA2B1</i> -qPCR-F | TTTGGGGATGGCTATAATGG      |
| <i>HNRNPA2B1</i> -qPCR-R | CTGGTTGCCATATCCAGGTC      |
| <i>ACTG1</i> -qPCR-F     | CCATCATGAAGTGTGACGTG      |
| <i>ACTG1</i> -qPCR-R     | ACACCGAGTACTTGCGCTCT      |
| <i>MIF</i> -qPCR-F       | TCATCGTAAACACCAACGTG      |
| <i>MIF</i> -qPCR-R       | GAAGGCCATGAGCTGGTC        |
| <i>VDAC2</i> -qPCR-F     | TTGATACTACCTTCTCACCAAACAC |
| <i>VDAC2</i> -qPCR-R     | TCAAAGTCAACATCACAACCAA    |
| <i>CD99</i> -qPCR-F      | AACCCACCCAAACCGATGC       |
| <i>CD99</i> -qPCR-R      | TGAAAAGCTACCGGAGGAACTA    |
| <i>CLTA</i> -qPCR-F      | CTTCGCTGACGTGATTGGTTA     |
| <i>CLTA</i> -qPCR-R      | GCCTGTTCTAGGCTGTAGCAA     |
| <i>CLIC1</i> -qPCR-F     | ACCGCAGGTCGAATTGTTC       |
| <i>CLIC1</i> -qPCR-R     | ACGGTGGTAACATTGAAGGTG     |
| <i>HECTD3</i> -qPCR-F    | CATCGCCTGGGATCGAGAC       |
| <i>HECTD3</i> -qPCR-R    | CGCACTCGTAGGTCCATGTC      |
| <i>ANXA4</i> -qPCR-F     | GGAGGTA CTGTCAAAGCTGCT    |
| <i>ANXA4</i> -qPCR-R     | GGCAAGGACGCTAATAATGGC     |
| <i>B4GALNT1</i> -qPCR-F  | CAGAAACAAGTCCGAGCTATTGA   |
| <i>B4GALNT1</i> -qPCR-R  | GAGGGGCTGAACTTCCACAC      |
