# Supplementary material for: Collateral activity of the CRISPR/RfxCas13d system in human cells
Source: PubMed Central journal article supplement (PMC10049998; doi:10.1038/s42003-023-04708-2), 2023-03-28
Supplement: 42003_2023_4708_MOESM3_ESM.pdf [file 42003_2023_4708_MOESM3_ESM.pdf]

## Description of Additional Supplementary Files

**File name:** Supplementary Data 1

**Description:** The source data behind the graphs in the paper
